# Supplementary material for: A facile one-step hydrothermal approach to synthesize hierarchical core–shell NiFe2O4@NiFe2O4 nanosheet arrays on Ni foam with large specific capacitance for supercapacitors
Source: Royal Society of Chemistry journal article supplement (doi:10.1039/c8ra02559b), 2018-01-01
Supplement: c8ra02559b1.pdf [file c8ra02559b1.pdf]

## Supporting Information

### A Facile One-Step Hydrothermal Approach to Synthesize Hierarchically Core-Shell $\text{NiFe}_2\text{O}_4@\text{NiFe}_2\text{O}_4$ Nanosheet Arrays on Ni Foam with Large Specific Capacitance for Supercapacitors

Xinyang Zhang,<sup>a</sup> Ziqing Zhang,<sup>a</sup> Shuanggan Sun,<sup>a</sup> Yunpeng Wu,<sup>a</sup> Qiushi Sun<sup>a</sup> and Xiaoyang Liu<sup>\*a</sup>

<sup>a</sup> State Key Laboratory of Inorganic Synthesis and Preparative Chemistry, College of Chemistry, Jilin University, Changchun 130012, China. Tel/Fax: +86-0431-85168316. E-mail: liuxy@jlu.edu.cn

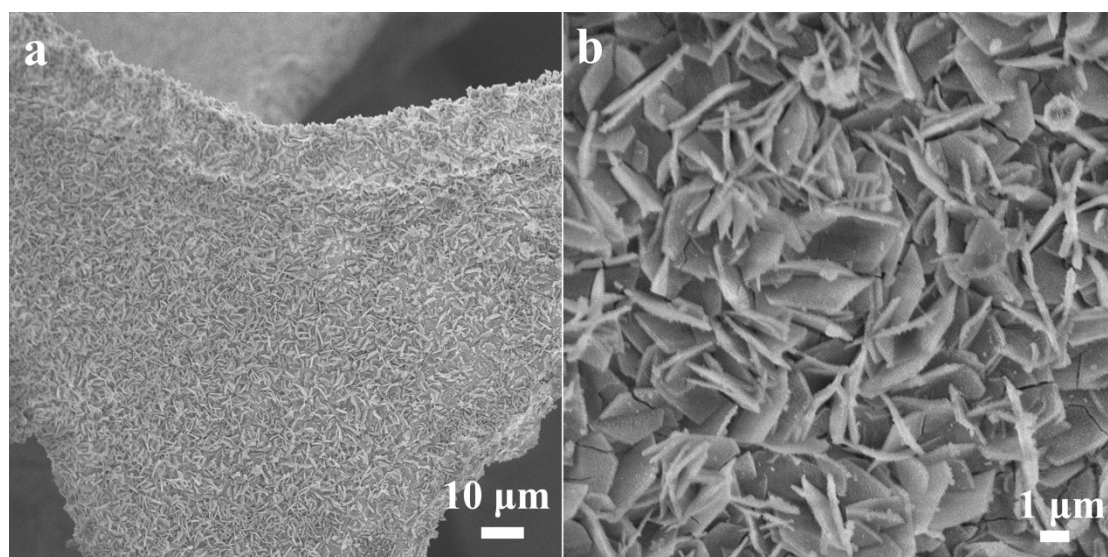

Figure S1. Low magnification SEM images.

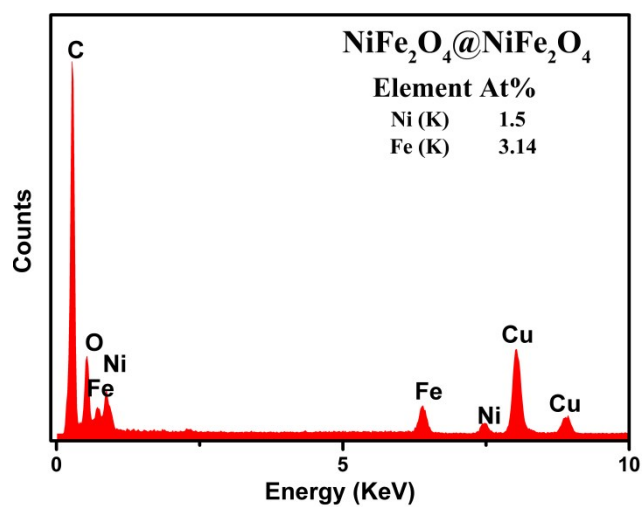

Figure S2. EDS spectra of NiFe<sub>2</sub>O<sub>4</sub>@ NiFe<sub>2</sub>O<sub>4</sub> core-shell NSAs.

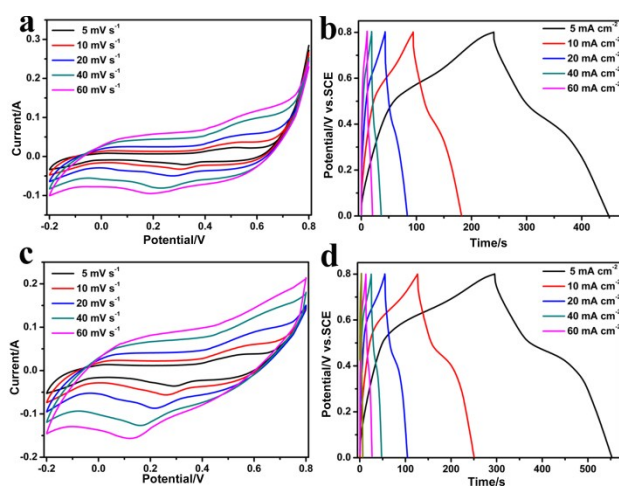

Figure S3. CV curves of (a) NFNF-2, (c) NFNF-6 electrode at various scan rates ranging from 5 to 60 mV s<sup>-1</sup>; CD curves of (b) NFNF-2, (d) NFNF-6 electrode at different current densities.

Nyquist plots of NFNF-2, NFNF-4 and NFNF-6 NSAs were taken in the frequency range from 0.01 Hz to 100 kHz under open circuit potential (OCP) were shown in Figure S4. The EIS plot consisted of a quasi-small semicircle in the high frequency region, representing the charge transfer process. A straight line with a slope towards the low frequency domain, represented the Warburg resistances ( $W_o$ ) for three electrode materials were almost the same. In the high frequency domain, the bulk resistance ( $R_s$ ) values of NFNF-2, NFNF-4 and NFNF-6 NSAs were found to be 1.02  $\Omega$ , 0.97  $\Omega$  and 1.01  $\Omega$ , respectively. As discussed above, the NFNF-4 NSAs possessed highest electronic conductivity and lowest equivalent series resistance (ESR) among the three electrodes.

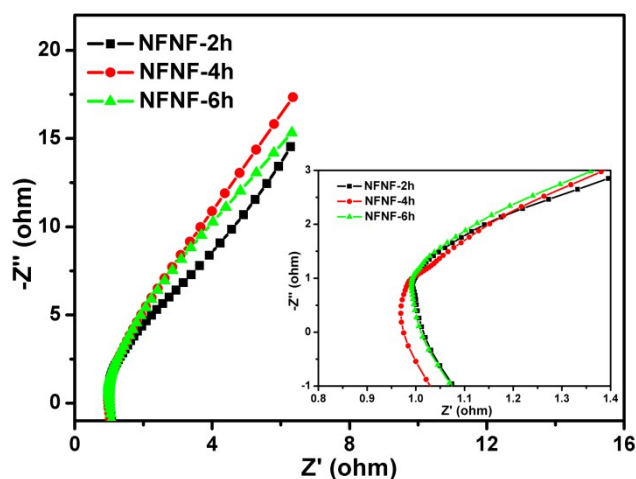

Figure S4 Nyquist plots of NFNF-2, NFNF-4 and NFNF-6 NSAs.

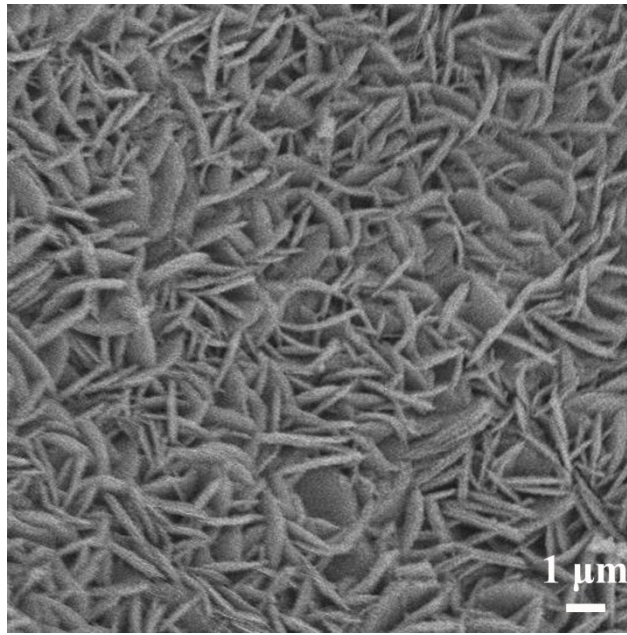

Figure S5 SEM of NiFe<sub>2</sub>O<sub>4</sub>@NiFe<sub>2</sub>O<sub>4</sub> core-shell NSAs after 5000 cycling tests.

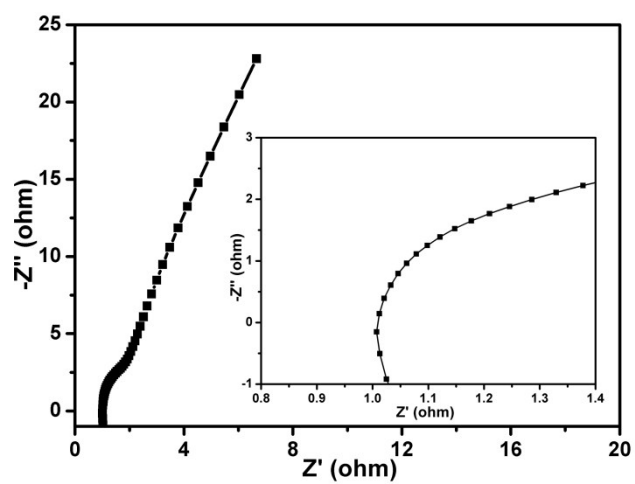

Figure S6 Nyquist plots of NiFe<sub>2</sub>O<sub>4</sub>@NiFe<sub>2</sub>O<sub>4</sub> core-shell NSAs after 5000 cycling tests.

Table S1 The comparison results of electrochemical performance for NFNF-2, NFNF-4 and NFNF-6 composite electrodes.

| <b>Samples</b> | Mass loading (mg cm <sup>-2</sup> ) | Ca (F cm <sup>-2</sup> ) | Cs (F g <sup>-1</sup> ) | Rate capability (%) |
|----------------|-------------------------------------|--------------------------|-------------------------|---------------------|
| <b>NFNF-2</b>  | 1.18                                | 1.13                     | 1031.6                  | 58.7                |
| <b>NFNF-4</b>  | 1.31                                | 1.65                     | 1377.4                  | 63.6                |
| <b>NFNF-6</b>  | 1.43                                | 1.55                     | 1193.1                  | 63.5                |

Table S2 Comparison of energy density of our hybrid supercapacitor and other previously reported asymmetric supercapacitors.

| <b>Asymmetric Supercapacitors</b>                                                        | <b>Energy density</b>                               | <b>Ref.</b> |
|------------------------------------------------------------------------------------------|-----------------------------------------------------|-------------|
| NiFe <sub>2</sub> O <sub>4</sub> @NiFe <sub>2</sub> O <sub>4</sub> //AC                  | 45.2 Wh kg <sup>-1</sup> at 174 W kg <sup>-1</sup>  | This work   |
| Co-Fe LDH@NiO-Ni//AC                                                                     | 22 Wh kg <sup>-1</sup> at 800 W kg <sup>-1</sup>    | 54          |
| NiFe <sub>2</sub> O <sub>4</sub> /CNT//N-doped graphene                                  | 23 Wh kg <sup>-1</sup> at 872 W kg <sup>-1</sup>    | 55          |
| Ni(OH) <sub>2</sub> //Fe <sub>2</sub> O <sub>3</sub> /RGO/Fe <sub>3</sub> O <sub>4</sub> | 4.1 Wh kg <sup>-1</sup> at 661.5 W kg <sup>-1</sup> | 56          |
| Ni-Fe LDH/GHA                                                                            | 17.6 Wh kg <sup>-1</sup> at 650 W kg <sup>-1</sup>  | 57          |
